# Supplementary material for: Maternal Lutein Intake during Pregnancies with or without Gestational Diabetes Mellitus and Cognitive Development of Children at 2 Years of Age: A Prospective Observational Study
Source: MDPI journal article supplement (doi:10.3390/nu16020328), 2024-01-22
Supplement: s1 [file s1]

**Supplementary Table S2.** Association between lutein intake or status and neonatal anthropometrics.

|                                   | Length  |      | Weight  |      | Head circumference |      |
|-----------------------------------|---------|------|---------|------|--------------------|------|
|                                   | $\beta$ | p    | $\beta$ | p    | $\beta$            | p    |
| Maternal lutein/zeaxanthin intake | 0.001   | 0.52 | -0.033  | 0.28 | 0.001              | 0.97 |
| Maternal plasma lutein            | -0.021  | 0.54 | 2.88    | 0.67 | -0.006             | 0.84 |
| Cord plasma lutein                | 0.009   | 0.36 | -0.27   | 0.95 | -0.035             | 0.24 |

n = 40 for the GDM group and n = 36 for non-GDM group for maternal biomarkers; n = 21 for the GDM group and n = 26 for the non-GDM group for cord blood markers. Analyzed with generalized linear model adjusted for GDM status and sex of neonate.
