# Supplementary material for: Maternal Lutein Intake during Pregnancies with or without Gestational Diabetes Mellitus and Cognitive Development of Children at 2 Years of Age: A Prospective Observational Study
Source: MDPI journal article supplement (doi:10.3390/nu16020328), 2024-01-22
Supplement: s1 [file s1]

**Supplementary Table S1.** Association between blood lipid and lutein levels in the maternal and fetal dyad.

|          |     | Maternal lutein |         | Cord lutein |         |
|----------|-----|-----------------|---------|-------------|---------|
|          |     | $\beta$         | p value | $\beta$     | p value |
| Maternal |     |                 |         |             |         |
|          | HDL | 0.11            | 0.28    | -0.11       | 0.38    |
|          | LDL | -0.01           | 0.84    | -0.04       | 0.19    |
|          | TG  | 0.01            | 0.87    | 0.01        | 0.46    |
|          | FFA | -0.01           | 0.71    | -0.01       | 0.97    |
| Cord     |     |                 |         |             |         |
|          | HDL | 0.097           | 0.49    | -0.19       | 0.09    |
|          | LDL | -0.059          | 0.26    | -0.09       | 0.12    |
|          | TG  | -0.057          | 0.052   | -0.02       | 0.64    |
|          | FFA | -0.017          | 0.052   | -0.01       | 0.59    |

n = 40 for the GDM group and n = 36 for non-GDM group for maternal biomarkers; n = 21 for the GDM group and n = 26 for the non-GDM group for cord blood markers. Analyzed with generalized linear model adjusted for GDM status. FFA, free fatty acid; HDL, high-density lipoprotein; LDL, low-density lipoprotein; TG, triglyceride.
