# Supplementary figures and images for: Maternal Lutein Intake during Pregnancies with or without Gestational Diabetes Mellitus and Cognitive Development of Children at 2 Years of Age: A Prospective Observational Study
Source: MDPI journal article supplement (doi:10.3390/nu16020328), 2024-01-22

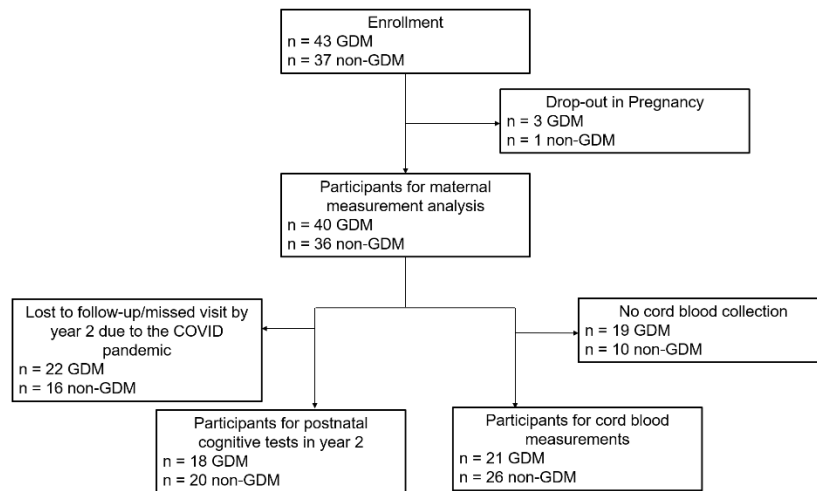

**Supplementary Figure S1.** Flowchart of the study.

Supplement: s1 [file s1]
